# Supplementary material for: LINADMIX: evaluating the effect of ancient admixture events on modern populations
Source: Oxford University Press journal article supplement (doi:10.1093/bioinformatics/btab531), 2021-07-15
Supplement: btab531_supplementary_data.zip [file btab531_supplementary_data.zip]

Archive with 3 entries (3 files):
- Supplementary Figures.pdf
- Supplementary Tables.pdf
- Supplementary Texts.pdf
