# Supplementary material for: LINADMIX: evaluating the effect of ancient admixture events on modern populations
Source: Oxford University Press journal article supplement (doi:10.1093/bioinformatics/btab531), 2021-07-15
Supplement: btab531_supplementary_data.zip [file btab531_supplementary_data.zip › Supplementary Figures.pdf]

Supplementary Figures for the paper:  
LINADMIX: Evaluating the effect of ancient admixture events  
on modern populations

Lily Agranat-Tamir *et al.*

A

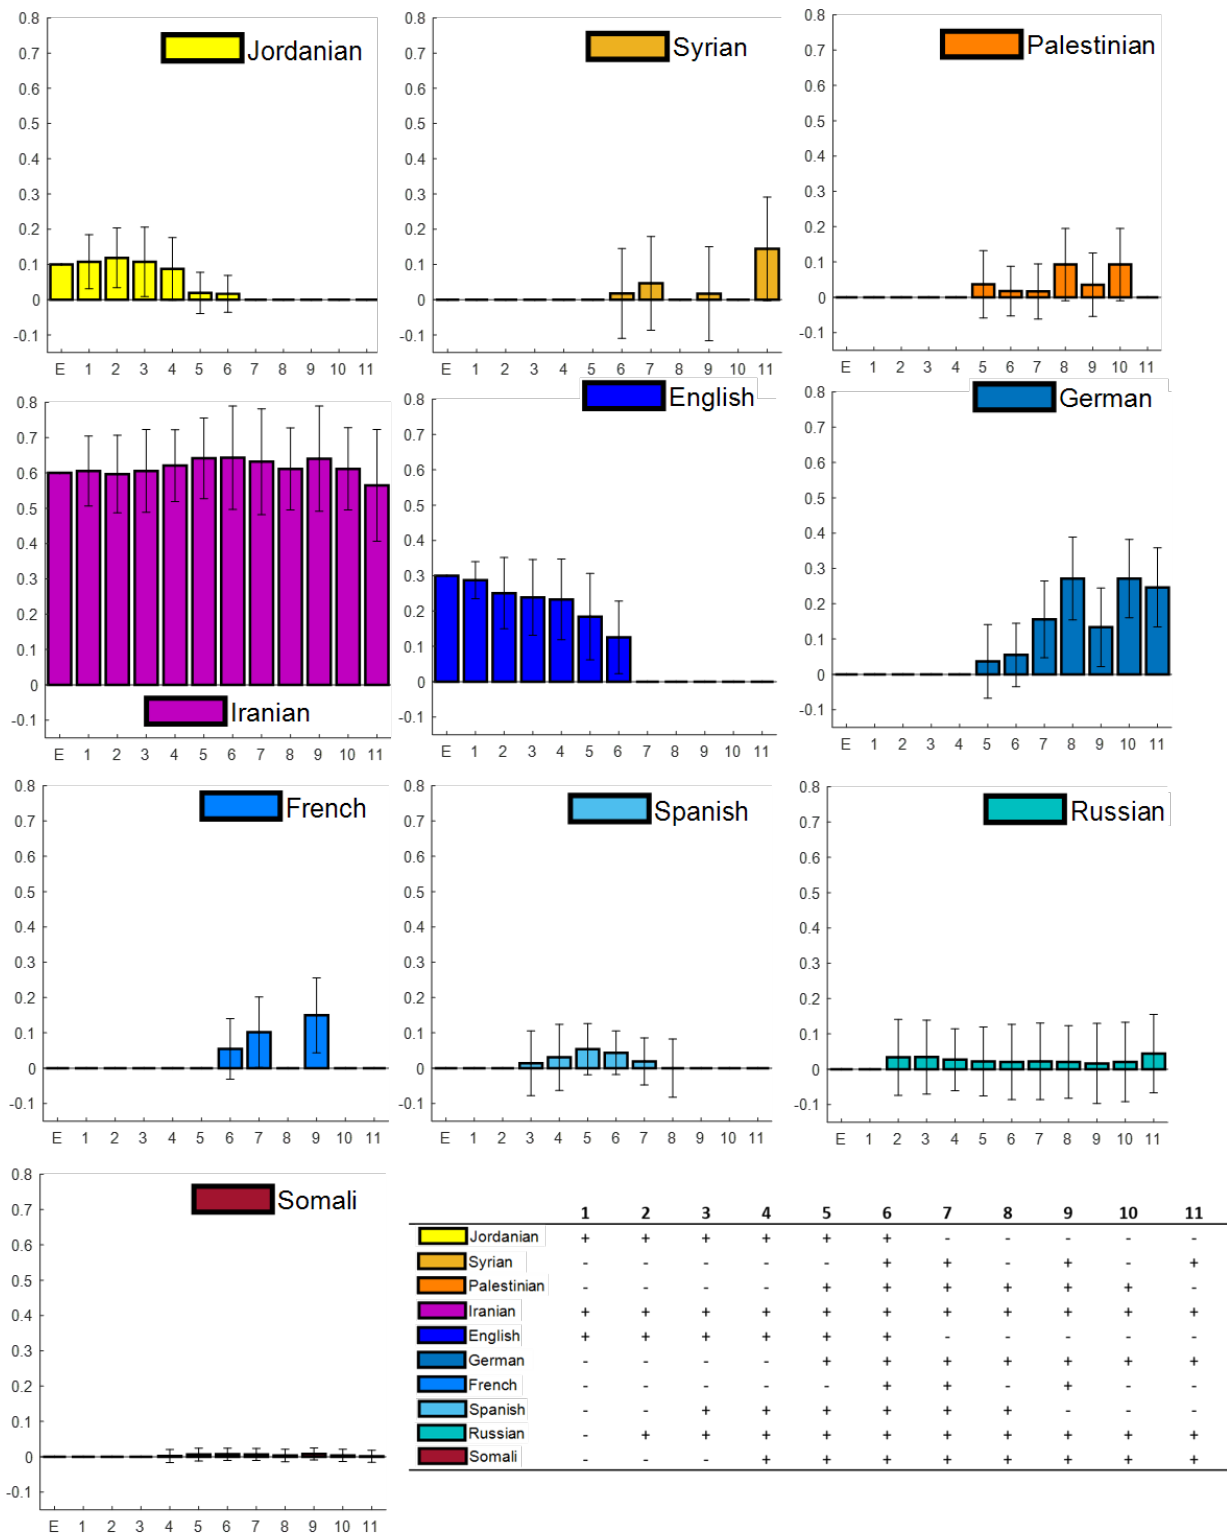

B

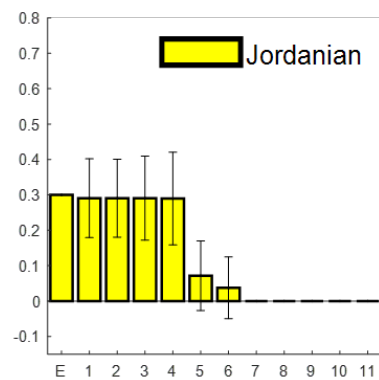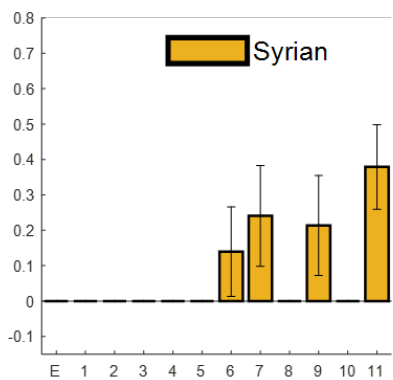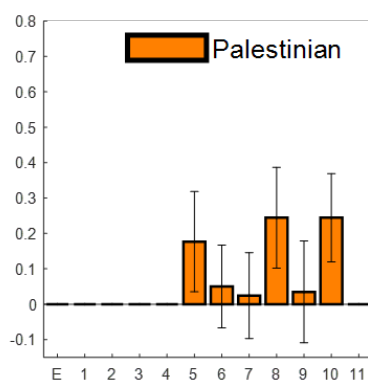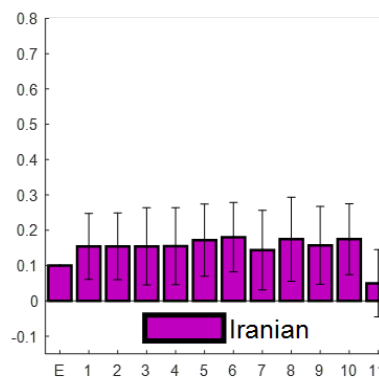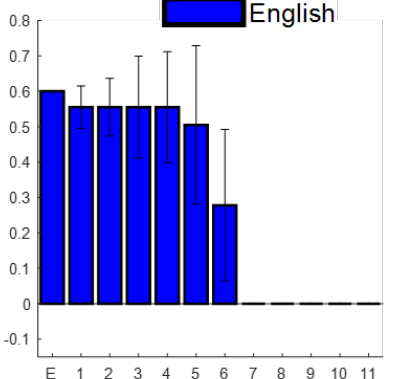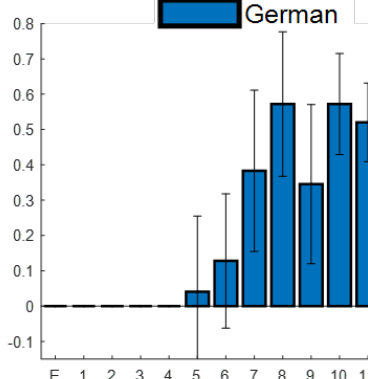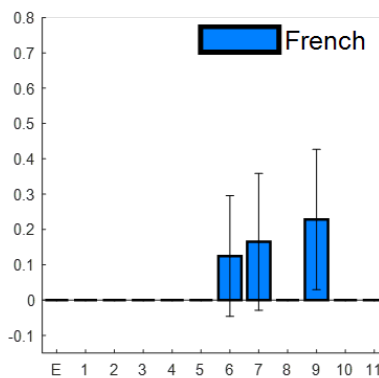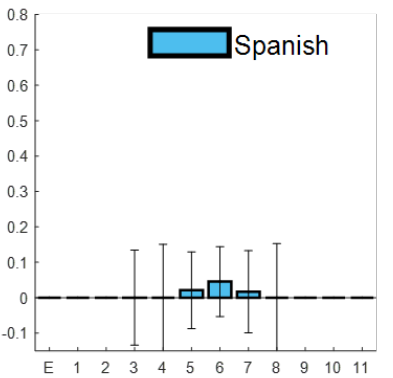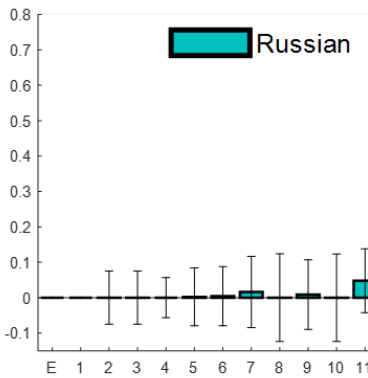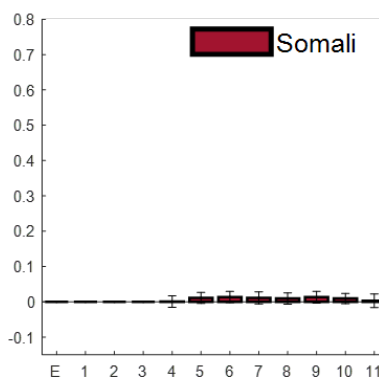

|             | 1 | 2 | 3 | 4 | 5 | 6 | 7 | 8 | 9 | 10 | 11 |
|-------------|---|---|---|---|---|---|---|---|---|----|----|
| Jordanian   | + | + | + | + | + | + | - | - | - | -  | -  |
| Syrian      | - | - | - | - | - | + | + | - | + | -  | +  |
| Palestinian | - | - | - | - | + | + | + | + | + | +  | -  |
| Iranian     | + | + | + | + | + | + | + | + | + | +  | +  |
| English     | + | + | + | + | + | + | - | - | - | -  | -  |
| German      | - | - | - | - | + | + | + | + | + | +  | +  |
| French      | - | - | - | - | - | + | + | - | + | -  | -  |
| Spanish     | - | - | + | + | + | + | + | + | - | -  | -  |
| Russian     | - | + | + | + | + | + | + | + | + | +  | +  |
| Somali      | - | - | - | + | + | + | + | + | + | +  | +  |

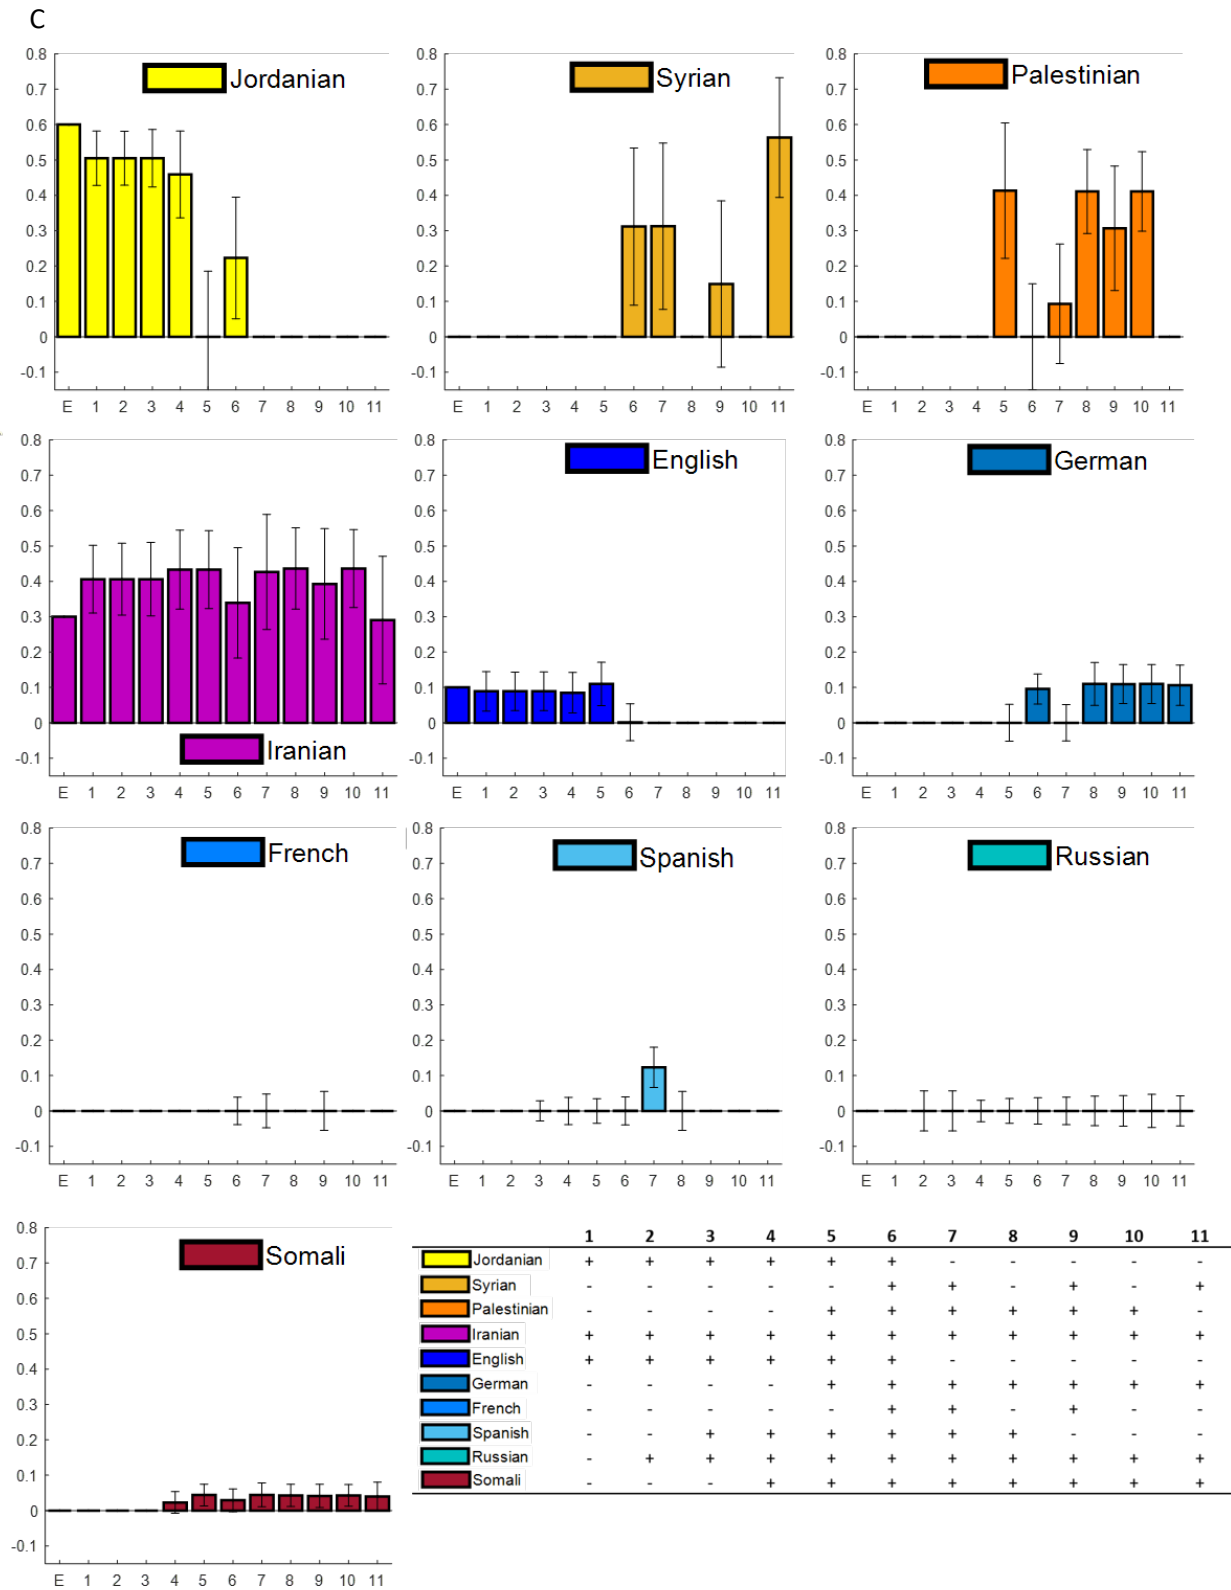

Figure S1. Nested models for targets composed of Jordanians, Iranians, and English. Each panel gives the expected and estimated contribution of the indicated population with standard errors in 11 models where different source populations were given to LINADMIX. The table indicates the presence (+) or absence (-) of the populations from the list of sources in the 11 models. A, B, C are for different proportions of Jordanians, Iranians, and English in the target population.
