# Supplementary material for: LINADMIX: evaluating the effect of ancient admixture events on modern populations
Source: Oxford University Press journal article supplement (doi:10.1093/bioinformatics/btab531), 2021-07-15
Supplement: btab531_supplementary_data.zip [file btab531_supplementary_data.zip › Supplementary Tables.pdf]

Supplementary Tables for the paper:  
LINADMIX: Evaluating the effect of ancient admixture events  
on modern populations

Lily Agranat-Tamir *et al.*

|             | Jordanian | English | Iranian | Spanish | Russian | Iran_ChL | Iran_N | Levant_N | German | French | Palestinian | Syrian | Somali |
|-------------|-----------|---------|---------|---------|---------|----------|--------|----------|--------|--------|-------------|--------|--------|
| Jordanian   | 0         | 0.013   | 0.004   | 0.009   | 0.017   | 0.013    | 0.046  | 0.025    | 0.013  | 0.011  | 0.003       | 0.002  | 0.049  |
| English     | 0.013     | 0       | 0.013   | 0.003   | 0.005   | 0.027    | 0.061  | 0.042    | 0.001  | 0.001  | 0.016       | 0.014  | 0.075  |
| Iranian     | 0.004     | 0.013   | 0       | 0.011   | 0.015   | 0.007    | 0.032  | 0.037    | 0.012  | 0.011  | 0.007       | 0.004  | 0.062  |
| Spanish     | 0.009     | 0.003   | 0.011   | 0       | 0.008   | 0.022    | 0.06   | 0.034    | 0.003  | 0.001  | 0.012       | 0.01   | 0.068  |
| Russian     | 0.017     | 0.005   | 0.015   | 0.008   | 0       | 0.028    | 0.06   | 0.048    | 0.003  | 0.005  | 0.021       | 0.017  | 0.075  |
| Iran_ChL    | 0.013     | 0.027   | 0.007   | 0.022   | 0.028   | 0        | 0.022  | 0.034    | 0.025  | 0.023  | 0.015       | 0.012  | 0.07   |
| Iran_N      | 0.046     | 0.061   | 0.032   | 0.06    | 0.06    | 0.022    | 0      | 0.078    | 0.06   | 0.06   | 0.048       | 0.044  | 0.092  |
| Levant_N    | 0.025     | 0.042   | 0.037   | 0.034   | 0.048   | 0.034    | 0.078  | 0        | 0.041  | 0.039  | 0.027       | 0.027  | 0.075  |
| German      | 0.013     | 0.001   | 0.012   | 0.003   | 0.003   | 0.025    | 0.06   | 0.041    | 0      | 0.001  | 0.016       | 0.013  | 0.074  |
| French      | 0.011     | 0.001   | 0.011   | 0.001   | 0.005   | 0.023    | 0.06   | 0.039    | 0.001  | 0      | 0.014       | 0.012  | 0.072  |
| Palestinian | 0.003     | 0.016   | 0.007   | 0.012   | 0.021   | 0.015    | 0.048  | 0.027    | 0.016  | 0.014  | 0           | 0.004  | 0.052  |
| Syrian      | 0.002     | 0.014   | 0.004   | 0.01    | 0.017   | 0.012    | 0.044  | 0.027    | 0.013  | 0.012  | 0.004       | 0      | 0.052  |
| Somali      | 0.049     | 0.075   | 0.062   | 0.068   | 0.075   | 0.07     | 0.092  | 0.075    | 0.074  | 0.072  | 0.052       | 0.052  | 0      |

**Table S1.**  $F_{ST}$  values.

**model 1:** target: Jordanian 20% English 80%; sources: Jordanian, English

**model 2:** target: Jordanian 50% English 50%; sources: Jordanian, English

**model 3:** target: Jordanian 80% English 20%; sources: Jordanian, English

| Proportion of missing SNPs | average error (percentage points) | maximum error (percentage points) | average standard error (percentage points) | p-value (model 1) | p-value (model 2) | p-value (model 3) |
|----------------------------|-----------------------------------|-----------------------------------|--------------------------------------------|-------------------|-------------------|-------------------|
| 0.4                        | 2.25                              | 5.05                              | 5.05                                       | 0.0233            | 0.1501            | 0.2415            |
| 0.6                        | 2.80                              | 4.21                              | 5.17                                       | 0.7779            | 1.0000            | 0.6017            |
| 0.8                        | 4.24                              | 7.95                              | 6.67                                       | 0.0054            | 0.0098            | 0.0013            |
| 0.9                        | 10.44                             | 14.04                             | 7.74                                       | 0.0003            | 0.0011            | 0.0002            |

**model 4:** target: Spanish 20% Russian 80%; sources: Spanish and Russian

**model 5:** target: Spanish 50% Russian 50%; sources: Spanish and Russian

**model 6:** target: Spanish 80% Russian 20%; sources: Spanish and Russian

| Proportion of missing SNPs | average error (percentage points) | maximum error (percentage points) | average standard error (percentage points) | p-value (model 4) | p-value (model 5) | p-value (model 6) |
|----------------------------|-----------------------------------|-----------------------------------|--------------------------------------------|-------------------|-------------------|-------------------|
| 0.4                        | 1.97                              | 4.37                              | 8.83                                       | 0.4651            | 0.7338            | 0.3936            |
| 0.6                        | 4.18                              | 6.34                              | 8.31                                       | 0.3857            | 0.7720            | 0.1858            |
| 0.8                        | 1.88                              | 4.26                              | 11.08                                      | 0.0139            | 0.1514            | 0.3293            |
| 0.9                        | 4.15                              | 6.63                              | 14.62                                      | 0.0009            | 0.0414            | 0.3674            |

**Table S2.** Admixture models used in the simulations with different proportions of missing SNPs. P-values below 0.05 are shaded.

**model 1:** target: Jordanian 20% Iranian 80%; sources: Jordanian, Iranian

**model 2:** target: Jordanian 50% Iranian 50%; sources: Jordanian, Iranian

**model 3:** target: Jordanian 80% Iranian 20%; sources: Jordanian, Iranian

| set | average error<br>(percentage<br>points) | maximum error<br>(percentage<br>points) | average standard<br>error (percentage<br>points) | p-value<br>(model 1) | p-value<br>(model 2) | p-value<br>(model 3) |
|-----|-----------------------------------------|-----------------------------------------|--------------------------------------------------|----------------------|----------------------|----------------------|
| 1   | 1.18                                    | 2.70                                    | 17.44                                            | 0.0011               | 0.0019               | 0.0005               |
| 2   | 4.94                                    | 8.11                                    | 15.47                                            | 0.2571               | 0.1294               | 0.0693               |

**Table S3.** Admixture of two closely related populations. P-values below 0.05 are shaded.

**target 1:** Jordanian 20% English 80%  
**target 2:** Jordanian 50% English 50%  
**target 3:** Jordanian 80% English 20%  
**target 4:** Jordanian 20% Iranian 80%  
**target 5:** Jordanian 50% Iranian 50%  
**target 6:** Jordanian 80% Iranian 20%

|          | sources provided to<br>LINADMIX            | F <sub>ST</sub> of<br>alternative<br>and original<br>populations | average<br>error<br>(percentage<br>points) | maximum<br>error<br>(percentage<br>points) | average<br>standard<br>error<br>(percentage<br>points) | p-value<br>(target<br>1) | p-value<br>(target<br>2) | p-value<br>(target<br>3) |
|----------|--------------------------------------------|------------------------------------------------------------------|--------------------------------------------|--------------------------------------------|--------------------------------------------------------|--------------------------|--------------------------|--------------------------|
| <b>A</b> | Jordanian and English                      |                                                                  | 2.89                                       | 4.41                                       | 5.43                                                   | 0.8012                   | 0.9999                   | 0.7063                   |
|          | Jordanian and German                       | 0.001                                                            | 2.89                                       | 4.22                                       | 5.02                                                   | 0.0389                   | 0.8039                   | 0.9452                   |
|          | Jordanian and merged<br>English and German |                                                                  | 2.89                                       | 4.33                                       | 4.83                                                   | 0.1231                   | 0.9760                   | 0.8408                   |
|          | Jordanian and French                       | 0.001                                                            | 6.78                                       | 7.60                                       | 5.13                                                   | 0.6420                   | 0.8385                   | 0.5417                   |
|          | Syrian and English                         | 0.002                                                            | 1.75                                       | 2.99                                       | 5.42                                                   | 0.9802                   | 0.5213                   | 0.0493                   |
|          | Palestinian and English                    | 0.003                                                            | 3.85                                       | 6.58                                       | 4.74                                                   | 0.9382                   | 0.4569                   | 0.1375                   |
|          | Iranian and English                        | 0.004                                                            | 3.27                                       | 4.81                                       | 5.73                                                   | 0.0238                   | 0.0262                   | 0.0481                   |
|          | Syrian and German                          | 0.002;0.001                                                      | 1.63                                       | 3.50                                       | 5.06                                                   | 0.0724                   | 0.4623                   | 0.1030                   |
|          | Syrian and French                          | 0.002;0.001                                                      | 4.97                                       | 5.89                                       | 4.91                                                   | 0.4152                   | 0.3321                   | 0.0285                   |
|          | Palestinian and German                     | 0.003;0.001                                                      | 3.91                                       | 6.46                                       | 4.35                                                   | 0.0805                   | 0.5533                   | 0.2025                   |
|          | Palestinian and French                     | 0.003;0.001                                                      | 8.20                                       | 8.99                                       | 4.28                                                   | 0.2535                   | 0.1658                   | 0.0801                   |
|          |                                            |                                                                  |                                            |                                            |                                                        | p-value<br>(target<br>4) | p-value<br>(target<br>5) | p-value<br>(target<br>6) |
| <b>B</b> | Jordanian and Iranian                      |                                                                  | 5.08                                       | 8.59                                       | 15.56                                                  | 0.2757                   | 0.1003                   | 0.0573                   |
|          | Syrian and Iranian                         | 0.002                                                            | 6.82                                       | 16.78                                      | 17.79                                                  | 0.2896                   | 0.1734                   | 0.0039                   |
|          | Palestinian and Iranian                    | 0.003                                                            | 12.49                                      | 17.25                                      | 12.45                                                  | 0.2029                   | 0.0546                   | 0.0027                   |
|          | Jordanian and Iran_ChL                     | 0.007                                                            | 13.55                                      | 18.77                                      | 17.35                                                  | 0.0001                   | 0.0001                   | 0.0081                   |

**Table S2.** Replacing Jordanian and English sources with proxy populations. **A.** Targets are mixtures of Jordanians and English. **B.** Targets are mixtures of Jordanians and Iranians. P-values below 0.05 are shaded.

**target 1:** French 20% Palestinian 80%

**target 2:** French 50% Palestinian 50%

**target 3:** French 80% Palestinian 20%

|              | sample size<br>provided to<br>LINADMIX | average error<br>(percentage<br>points) | maximum<br>error<br>(percentage<br>points) | average<br>standard error<br>(percentage<br>points) | p-value<br>(target 1) | p-value<br>(target 2) | p-value<br>(target 3) |
|--------------|----------------------------------------|-----------------------------------------|--------------------------------------------|-----------------------------------------------------|-----------------------|-----------------------|-----------------------|
| <b>set 1</b> | 2                                      | 5.66                                    | 7.11                                       | 5.28                                                | 0.5218                | 0.9153                | 0.5717                |
|              | 4                                      | 2.62                                    | 4.59                                       | 7.56                                                | 0.8276                | 0.6858                | 0.3687                |
|              | 8                                      | 2.21                                    | 3.76                                       | 7.30                                                | 0.8766                | 0.9612                | 0.5298                |
|              | 12                                     | 2.67                                    | 3.48                                       | 6.71                                                | 0.9868                | 0.9261                | 0.4122                |
|              | 16                                     | 3.58                                    | 6.12                                       | 7.32                                                | 0.9956                | 0.8040                | 0.3066                |
|              | 20                                     | 3.28                                    | 5.47                                       | 7.06                                                | 0.9804                | 0.8296                | 0.3584                |
| <b>set 2</b> | 2                                      | 2.95                                    | 4.00                                       | 9.13                                                | 0.1193                | 0.0326                | 0.0340                |
|              | 4                                      | 2.80                                    | 3.97                                       | 6.95                                                | 0.4086                | 0.2407                | 0.2768                |
|              | 8                                      | 3.89                                    | 6.12                                       | 7.10                                                | 0.5147                | 0.3579                | 0.3413                |
|              | 12                                     | 4.26                                    | 7.41                                       | 6.79                                                | 0.6940                | 0.4773                | 0.3697                |
|              | 16                                     | 4.09                                    | 6.88                                       | 7.28                                                | 0.6914                | 0.5004                | 0.3595                |
|              | 20                                     | 3.29                                    | 5.53                                       | 7.31                                                | 0.9788                | 0.8125                | 0.3688                |
| <b>set 3</b> | 2                                      | 6.03                                    | 10.71                                      | 8.73                                                | 0.7666                | 0.1500                | 0.0027                |
|              | 4                                      | 4.80                                    | 8.46                                       | 6.46                                                | 0.3725                | 0.3126                | 0.0271                |
|              | 8                                      | 4.68                                    | 8.29                                       | 5.64                                                | 0.9244                | 0.6941                | 0.2082                |
|              | 12                                     | 4.05                                    | 7.08                                       | 6.18                                                | 0.9767                | 0.7090                | 0.2525                |
|              | 16                                     | 3.45                                    | 5.82                                       | 6.54                                                | 0.9928                | 0.7246                | 0.3307                |
|              | 20                                     | 3.27                                    | 5.29                                       | 6.70                                                | 0.9224                | 0.7552                | 0.3218                |

**Table S5.** Effect of sample size on LINADMIX performance across three sets of runs of increasing sample size. P-values below 0.05 are shaded.

A. **sources:** Jordanian, English, 3rd population

**target:** Jordanian 20% English 80%

| third population | estimate of third population | standard error | p-value |
|------------------|------------------------------|----------------|---------|
| Somali           | 2E-09                        | 0.0125         | 0.8038  |
| Iran_ChL         | 0.0582                       | 0.1048         | 0.9887  |
| Russian          | 1E-06                        | 0.1295         | 0.8550  |

**target:** Jordanian 50% English 50%

| third population | estimate of third population | standard error | p-value |
|------------------|------------------------------|----------------|---------|
| Somali           | 1E-05                        | 0.0169         | 1       |
| Iran_ChL         | 0.0003                       | 0.1050         | 0.9999  |
| Russian          | 3E-05                        | 0.1414         | 1       |

**target:** Jordanian 80% English 20%

| third population | estimate of third population | standard error | p-value |
|------------------|------------------------------|----------------|---------|
| Somali           | 0.0111                       | 0.0200         | 0.7870  |
| Iran_ChL         | 0.0003                       | 0.1050         | 0.7151  |
| Russian          | 0.0405                       | 0.1060         | 0.8260  |

**Table S6A.** Target population of Jordanian and English admixture, modeled by the original source populations with the addition of a third population.

B. **sources:** Jordanian, English, 3rd population

**target:** Jordanian 20% English 80%

| third population | estimate of third population | standard error | standard error of related population | standard error of non-related population | p-value |
|------------------|------------------------------|----------------|--------------------------------------|------------------------------------------|---------|
| Syrian           | 0.2250                       | 0.1178         | 0.0984                               | 0.0667                                   | 0.9228  |
| Palestinian      | 2E-05                        | 0.1066         | 0.1138                               | 0.0629                                   | 0.8007  |
| German           | 0.2282                       | 0.2974         | 0.3089                               | 0.0479                                   | 0.8022  |
| French           | 3E-07                        | 0.3213         | 0.3019                               | 0.0634                                   | 0.7945  |

**target:** Jordanian 50% English 50%

| third population | estimate of third population | standard error | standard error of related population | standard error of non-related population | p-value |
|------------------|------------------------------|----------------|--------------------------------------|------------------------------------------|---------|
| Syrian           | 5E-05                        | 0.1930         | 0.1843                               | 0.0533                                   | 1       |
| Palestinian      | 0.0372                       | 0.1887         | 0.1942                               | 0.0520                                   | 1       |
| German           | 0.0022                       | 0.2298         | 0.2375                               | 0.0461                                   | 1       |
| French           | 0.0179                       | 0.2460         | 0.2343                               | 0.0552                                   | 0.9999  |

| target: Jordanian 80% English 20% |                              |                |                                      |                                          |         |
|-----------------------------------|------------------------------|----------------|--------------------------------------|------------------------------------------|---------|
| third population                  | estimate of third population | standard error | standard error of related population | standard error of non-related population | p-value |
| Syrian                            | 1E-06                        | 0.2773         | 0.2759                               | 0.0387                                   | 0.7132  |
| Palestinian                       | 0.0051                       | 0.2821         | 0.2800                               | 0.0422                                   | 0.7129  |
| German                            | 0.0121                       | 0.1253         | 0.1287                               | 0.0434                                   | 0.7135  |
| French                            | 4E-06                        | 0.1356         | 0.1296                               | 0.0486                                   | 0.7084  |

**Table S6B.** Target population of Jordanian and English admixture, modeled by the original source populations with the addition of a third population that is similar to one of the sources.

**sources:** Jordanian, Iranian, 3rd population

| target: Jordanian 20% Iranian 80% |                              |                                 |                          |                        |         |
|-----------------------------------|------------------------------|---------------------------------|--------------------------|------------------------|---------|
| third population                  | estimate of third population | standard error third population | standard error Jordanian | standard error Iranian | p-value |
| Somali                            | 0.0243                       | 0.0161                          | 0.1326                   | 0.1327                 | 0.2718  |
| Iran_ChL                          | 6E-10                        | 0.0493                          | 0.1433                   | 0.1491                 | 0.2787  |
| Russian                           | 0.0544                       | 0.0366                          | 0.1568                   | 0.1552                 | 0.9448  |
| Palestinian                       | 2E-08                        | 0.0990                          | 0.1243                   | 0.1324                 | 0.2749  |
| Syrian                            | 2E-06                        | 0.0965                          | 0.1367                   | 0.1413                 | 0.2815  |
| target: Jordanian 50% Iranian 50% |                              |                                 |                          |                        |         |
| third population                  | estimate of third population | standard error third population | standard error Jordanian | standard error Iranian | p-value |
| Somali                            | 0.0198                       | 0.0222                          | 0.1660                   | 0.1624                 | 0.0876  |
| Iran_ChL                          | 2E-06                        | 0.0546                          | 0.1622                   | 0.1679                 | 0.1010  |
| Russian                           | 0.0680                       | 0.0422                          | 0.1825                   | 0.2047                 | 0.9678  |
| Palestinian                       | 5E-07                        | 0.1730                          | 0.1946                   | 0.1417                 | 0.1052  |
| Syrian                            | 0.0175                       | 0.1842                          | 0.1956                   | 0.1562                 | 0.1021  |
| target: Jordanian 80% Iranian 20% |                              |                                 |                          |                        |         |
| third population                  | estimate of third population | standard error third population | standard error Jordanian | standard error Iranian | p-value |
| Somali                            | 3E-05                        | 0.0255                          | 0.1799                   | 0.1748                 | 0.0604  |
| Iran_ChL                          | 1E-06                        | 0.0872                          | 0.1657                   | 0.1628                 | 0.0614  |
| Russian                           | 0.0538                       | 0.0420                          | 0.1483                   | 0.1635                 | 0.5312  |
| Palestinian                       | 1E-06                        | 0.2697                          | 0.2886                   | 0.1430                 | 0.0961  |
| Syrian                            | 0.0786                       | 0.2845                          | 0.2894                   | 0.1518                 | 0.0600  |

**Table S6C.** Target population of Jordanian and Iranian admixture, modeled by the original source populations with the addition of a third population.

**sources:** Somali, English, 3rd poplation

| target: Somali 20% English 80% |                              |                                 |                       |                        |         |
|--------------------------------|------------------------------|---------------------------------|-----------------------|------------------------|---------|
| third population               | estimate of third population | standard error third population | standard error Somali | standard error English | p-value |
| Levant_N                       | 0.0149                       | 0.0241                          | 0.0180                | 0.0307                 | 0.2429  |
| Iran_ChL                       | 0.0474                       | 0.0617                          | 0.0192                | 0.0563                 | 0.2814  |
| Russian                        | 5E-09                        | 0.0989                          | 0.0207                | 0.1049                 | 0.2223  |
| French                         | 0.1833                       | 0.2875                          | 0.0183                | 0.2886                 | 0.2478  |
| German                         | 0.0297                       | 0.2980                          | 0.0192                | 0.3009                 | 0.2230  |
| target: Somali 50% English 50% |                              |                                 |                       |                        |         |
| third population               | estimate of third population | standard error third population | standard error Somali | standard error English | p-value |
| Levant_N                       | 0.0217                       | 0.0340                          | 0.0223                | 0.0466                 | 0.2468  |
| Iran_ChL                       | 0.0661                       | 0.0503                          | 0.0214                | 0.0485                 | 0.5463  |
| Russian                        | 6E-08                        | 0.1051                          | 0.0235                | 0.1180                 | 0.3384  |
| French                         | 0.2815                       | 0.2204                          | 0.0240                | 0.2140                 | 0.3554  |
| German                         | 0.0589                       | 0.2201                          | 0.0229                | 0.2271                 | 0.3376  |
| target: Somali 80% English 20% |                              |                                 |                       |                        |         |
| third population               | estimate of third population | standard error third population | standard error Somali | standard error English | p-value |
| Levant_N                       | 0.0298                       | 0.0431                          | 0.0209                | 0.0493                 | 0.1235  |
| Iran_ChL                       | 0.0859                       | 0.0439                          | 0.0258                | 0.0309                 | 0.6489  |
| Russian                        | 4E-07                        | 0.0770                          | 0.0209                | 0.0840                 | 0.1009  |
| French                         | 0.2057                       | 0.1013                          | 0.0224                | 0.0954                 | 0.1151  |
| German                         | 0.0488                       | 0.0973                          | 0.0208                | 0.1018                 | 0.1063  |

**Table S6D.** Target population of Somali and English admixture, modeled by the original source populations with the addition of a third population.

| Composition of target population | Source populations provided to LINADMIX | estimation error (percentage points) | standard error (percentage points) | p-value |
|----------------------------------|-----------------------------------------|--------------------------------------|------------------------------------|---------|
| Jordanian 90% English 10%        | Jordanian and English                   | 5.62                                 | 4.77                               | 0.4435  |
| Jordanian 95% English 5%         | Jordanian and English                   | 4.94                                 | 5.10                               | 0.3029  |
| Jordanian 90% Iranian 10%        | Jordanian and Iranian                   | 0.17                                 | 14.07                              | 0.2369  |
| Jordanian 95% Iranian 5%         | Jordanian and Iranian                   | 5.00                                 | 12.34                              | 0.0548  |

**Table S7.** Simulations of a mixture where one source has a low contribution to a target population.

**model 1:** target: Jordanian 10% Iranian 60% English 30%; sources: Jordanian Iranian and English  
**model 2:** target: Jordanian 30% Iranian 10% English 60%; sources: Jordanian Iranian and English  
**model 3:** target: Jordanian 60% Iranian 30% English 10%; sources: Jordanian Iranian and English  
**model 4:** target: Jordanian 25% Iranian 25% English 25% Russian 25%; sources: Jordanian Iranian English and Russian

| calculation across      | average error<br>(percentage points) | maximum error<br>(percentage points) | average standard error<br>(percentage points) | p-value |
|-------------------------|--------------------------------------|--------------------------------------|-----------------------------------------------|---------|
| models 1-3, all sources | 4.13                                 | 9.92                                 | 7.66                                          |         |
| model1, all sources     | 1.19                                 | 1.79                                 | 6.95                                          | 0.9997  |
| model 2, all sources    | 4.58                                 | 6.87                                 | 8.60                                          | 0.8632  |
| model 3, all sources    | 6.61                                 | 9.92                                 | 7.42                                          | 0.4669  |
| model 4, all sources    | 5.41                                 | 10.81                                | 12.78                                         | 0.9881  |

**Table S8.** Admixture of three or four populations.

**target:** Jordanian 25% Iranian 25% English 80% Russian 25%

| Sources in the model          | p-value | Estimates<br>(Standard errors)     |
|-------------------------------|---------|------------------------------------|
|                               |         | 0.01;0.43;0.56<br>(0.09;0.14;0.07) |
| Jordanian Iranian and English | 0.4205  | 0.46;0;0.54<br>(0.05;0.20;0.16)    |
| Jordanian English and Russian | 0.2752  | 0.28;0.22;0.50<br>(0.12;0.13;0.04) |
| Jordanian Iranian and Russian | 0.2291  | 0.45;0.46;0.09<br>(0.15;0.06;0.12) |
| Iranian English and Russian   | 0.4297  | 1;0<br>(0.24;0.24)                 |
| English and Russian           | 0.0006  | 0.03;0.97<br>(0.13;0.13)           |
| Jordanian and Iranian         | 0.0001  | 0.38;0.62<br>(0.07;0.07)           |
| Jordanian and English         | 0.0054  | 0.46;0.54<br>(0.03;0.03)           |
| Jordanian and Russian         | 0.1764  | 0.52;0.48<br>(0.03;0.03)           |
| Iranian and Russian           | 0.0248  | 0.44;0.56<br>(0.07;0.07)           |
| Iranian and English           | 0.3812  |                                    |

**Table S9.** Model fit when at least one of the source populations is missing in a target that is an admixture of four populations. P-values below 0.05 are shaded.

| A           | E  | 1             | 2              | 3              | 4              | 5              | 6              | 7              | 8              | 9              | 10             | 11             |
|-------------|----|---------------|----------------|----------------|----------------|----------------|----------------|----------------|----------------|----------------|----------------|----------------|
| Jordanian   | 10 | 10.75<br>7.69 | 11.87<br>8.48  | 10.74<br>9.85  | 8.69<br>8.89   | 1.89<br>5.88   | 1.64<br>5.26   | -<br>-         | -<br>-         | -<br>-         | -<br>-         | -<br>-         |
| Syrian      | -  | -             | -              | -              | -              | -              | 1.77<br>12.76  | 4.62<br>13.31  | -<br>-         | 1.68<br>13.37  | -<br>-         | 14.40<br>14.73 |
| Palestinian | -  | -             | -              | -              | -              | 3.67<br>9.53   | 1.75<br>7.05   | 1.64<br>7.82   | 9.26<br>10.22  | 3.55<br>8.99   | 9.26<br>10.24  | -<br>-         |
| Iranian     | 60 | 60.53<br>9.90 | 59.69<br>11.00 | 60.57<br>11.70 | 62.08<br>10.17 | 64.14<br>11.42 | 64.31<br>14.64 | 63.19<br>14.99 | 61.16<br>17.45 | 64.04<br>14.90 | 61.17<br>11.65 | 56.46<br>15.84 |
| English     | 30 | 28.72<br>5.26 | 25.06<br>10.10 | 23.86<br>10.75 | 23.28<br>11.42 | 18.43<br>12.24 | 12.52<br>10.28 | -<br>-         | -<br>-         | -<br>-         | -<br>-         | -<br>-         |
| German      | -  | -             | -              | -              | -              | 3.66<br>10.43  | 5.49<br>8.98   | 15.57<br>10.87 | 27.14<br>11.74 | 13.33<br>11.12 | 27.15<br>11.09 | 24.62<br>11.20 |
| French      | -  | -             | -              | -              | -              | -              | 5.44<br>8.60   | 10.17<br>9.97  | -<br>-         | 14.97<br>10.62 | -<br>-         | -<br>-         |
| Spanish     | -  | -             | -              | 1.40<br>9.16   | 3.06<br>9.38   | 5.40<br>7.26   | 4.35<br>6.17   | 1.92<br>6.66   | 0.00<br>8.24   | -<br>-         | -<br>-         | -<br>-         |
| Russian     | -  | -             | 3.37<br>10.77  | 3.43<br>10.49  | 2.68<br>8.80   | 2.19<br>9.76   | 2.05<br>10.68  | 2.23<br>10.84  | 2.07<br>10.29  | 1.63<br>11.34  | 2.06<br>11.25  | 4.41 11.10     |
| Somali      | -  | -             | -              | -              | 0.22<br>1.85   | 0.62<br>1.82   | 0.68<br>1.72   | 0.65<br>1.71   | 0.36<br>1.76   | 0.79<br>1.69   | 0.36<br>1.73   | 0.12 1.73      |

| B           | E  | 1              | 2              | 3              | 4              | 5              | 6              | 7              | 8              | 9              | 10             | 11             |
|-------------|----|----------------|----------------|----------------|----------------|----------------|----------------|----------------|----------------|----------------|----------------|----------------|
| Jordanian   | 30 | 29.06<br>11.14 | 29.06<br>11.01 | 29.06<br>11.88 | 28.95<br>13.07 | 7.14<br>9.81   | 3.73<br>8.72   | -<br>-         | -<br>-         | -<br>-         | -<br>-         | -<br>-         |
| Syrian      | -  | -              | -              | -              | -              | -              | 13.93<br>12.65 | 24.05<br>14.20 | -<br>-         | 21.36<br>14.12 | -<br>-         | 37.90<br>11.96 |
| Palestinian | -  | -              | -              | -              | -              | 17.68<br>14.15 | 5.01<br>11.69  | 2.45<br>12.13  | 24.45<br>14.23 | 3.49<br>14.36  | 24.45<br>12.46 | -<br>-         |
| Iranian     | 10 | 15.43<br>9.34  | 15.43<br>9.45  | 15.43<br>10.93 | 15.49<br>10.91 | 17.17<br>10.10 | 18.01<br>9.84  | 14.36<br>11.25 | 17.45<br>11.89 | 15.69<br>11.01 | 17.44<br>10.05 | 4.97 9.51      |
| English     | 60 | 55.52<br>5.98  | 55.52<br>8.14  | 55.52<br>14.45 | 55.51<br>15.66 | 50.53<br>22.37 | 27.82<br>21.40 | -<br>-         | -<br>-         | -<br>-         | -<br>-         | -<br>-         |
| German      | -  | -              | -              | -              | -              | 4.08<br>21.38  | 12.77<br>19.01 | 38.29<br>22.83 | 57.19<br>20.47 | 34.53<br>22.55 | 57.19<br>14.30 | 52.04<br>11.12 |
| French      | -  | -              | -              | -              | -              | -              | 12.44<br>17.09 | 16.48<br>19.37 | -<br>-         | 22.80<br>19.86 | -<br>-         | -<br>-         |
| Spanish     | -  | -              | -              | 0.00<br>13.41  | 0.00<br>15.10  | 2.09<br>10.86  | 4.55<br>9.87   | 1.68<br>1.74   | 0.00<br>15.28  | -<br>-         | -<br>-         | -<br>-         |
| Russian     | -  | -              | 0.00<br>7.52   | 0.00<br>7.52   | 0.00<br>5.67   | 0.22<br>8.16   | 0.40<br>8.37   | 1.60<br>10.06  | 0.00<br>12.38  | 0.86<br>9.80   | 0.00<br>12.36  | 4.80 9.01      |
| Somali      | -  | -              | -              | -              | 0.05<br>1.64   | 1.08<br>1.58   | 1.33<br>1.60   | 1.09<br>1.74   | 0.91<br>1.62   | 1.28<br>1.69   | 0.91<br>1.47   | 0.30 1.93      |

| C           | E  | 1             | 2              | 3              | 4              | 5              | 6              | 7              | 8              | 9              | 10             | 11             |
|-------------|----|---------------|----------------|----------------|----------------|----------------|----------------|----------------|----------------|----------------|----------------|----------------|
| Jordanian   | 60 | 50.49<br>7.68 | 50.49<br>7.65  | 50.49<br>8.18  | 45.90<br>12.27 | 0.00<br>18.55  | 22.28<br>17.20 | -              | -              | -              | -              | -              |
| Syrian      | -  | -             | -              | -              | -              | -              | 31.15<br>22.26 | 31.24<br>23.51 | -              | 14.93<br>23.50 | -              | 56.31<br>16.94 |
| Palestinian | -  | -             | -              | -              | -              | 41.32<br>19.13 | 0.00<br>14.97  | 9.32<br>16.89  | 41.08<br>11.87 | 30.69<br>17.61 | 41.09<br>11.24 | -              |
| Iranian     | 30 | 40.61<br>9.59 | 40.61<br>10.14 | 40.61<br>10.36 | 43.30<br>11.18 | 43.31<br>11.01 | 33.92<br>15.63 | 42.67<br>16.27 | 43.64<br>11.48 | 39.27<br>15.63 | 43.64<br>11.02 | 29.05<br>18.02 |
| English     | 10 | 8.89<br>5.59  | 8.89<br>5.43   | 8.89<br>5.47   | 8.50<br>5.73   | 10.98<br>6.14  | 0.15<br>5.23   | -              | -              | -              | -              | -              |
| German      | -  | -             | -              | -              | -              | 0.00<br>5.23   | 9.56<br>4.27   | 0.00<br>5.14   | 10.97<br>6.07  | 10.95<br>5.52  | 10.98<br>5.50  | 10.62 5.70     |
| French      | -  | -             | -              | -              | -              | -              | 0.00<br>3.87   | 0.00<br>4.77   | -              | 0.00<br>5.51   | -              | -              |
| Spanish     | -  | -             | -              | 0.00<br>2.87   | 0.00<br>3.86   | 0.00<br>3.47   | 0.02<br>3.98   | 12.32<br>5.68  | 0.00<br>5.52   | -              | -              | -              |
| Russian     | -  | -             | 0.00<br>5.68   | 0.00<br>5.66   | 0.00<br>3.02   | 0.00<br>3.49   | 0.00<br>3.72   | 0.00<br>3.87   | 0.00<br>4.16   | 0.00<br>4.34   | 0.00<br>4.70   | 0.00 4.24      |
| Somali      | -  | -             | -              | -              | 2.30<br>3.04   | 4.39<br>3.09   | 2.91<br>3.24   | 4.44<br>3.35   | 4.29<br>3.13   | 4.14<br>3.27   | 4.29<br>3.07   | 4.00 4.05      |

**Table S10.** Estimated contribution when multiple sources are given to LINADMIX. The 'E' column represents the expected contribution. '-' indicates that the population was not given as a source in that model.
